# Supplementary material for: Chitosan/Virgin Coconut Oil-Based Emulsions Doped with Photosensitive Curcumin Loaded Capsules: A Functional Carrier to Topical Treatment
Source: MDPI journal article supplement (doi:10.3390/polym16050641), 2024-02-27
Supplement: s1 [file s1]

## Supplementary information

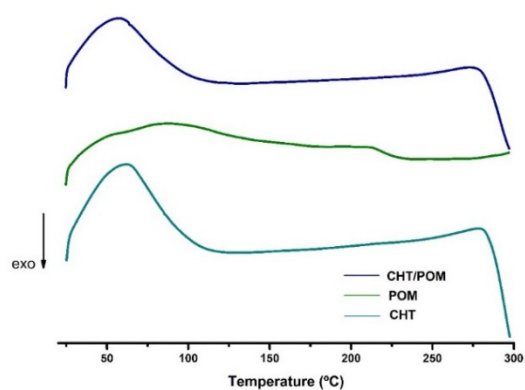

**Figure S1.** DSC thermogram of the polymeric matrix, inorganic salt, and (CHT/POM)<sub>5</sub> film.

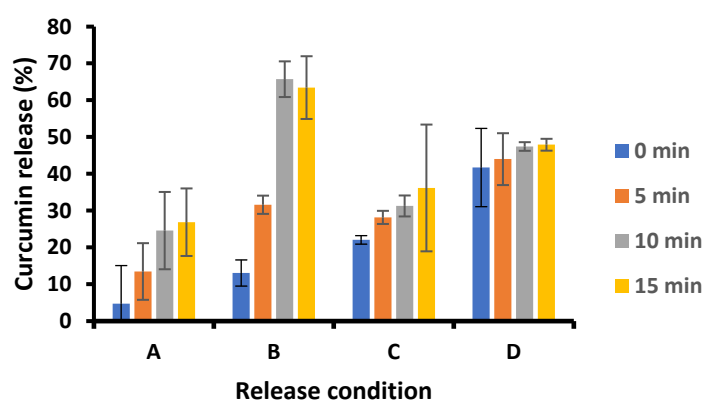

**Figure S2.** Curcumin release from (CHT/POM)<sub>5</sub> microcapsules subjected to different irradiation times and release conditions (A-50  $\mu$ L, B-100  $\mu$ L, C-200  $\mu$ L and D-500  $\mu$ L addition of 0.1M NaOH solution)

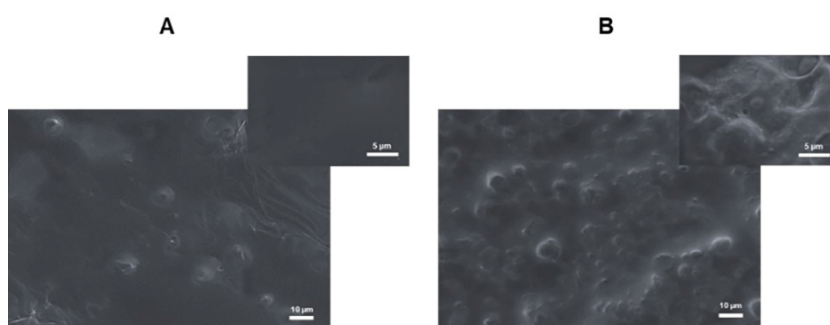

**Figure S3.** SEM micrographs of CHT/VCO films (A) non-loaded and (B) loaded with CUR(CHT/POM)<sub>5</sub>.
